# Supplementary material for: Reliability, validity and responsiveness of the German self-reported foot and ankle score (SEFAS) in patients with foot or ankle surgery
Source: Springer Nature journal article supplement (doi:10.1186/s12891-017-1772-1), 2017-10-10
Supplement: MOESM1 [file 15124106]

# „SEFAS“: Fragebogen zu Fuß- und Sprunggelenk

Deutsche Version

Datum: \_\_\_\_/\_\_\_\_/\_\_\_\_ Geburtsdatum: \_\_\_\_/\_\_\_\_/\_\_\_\_

Name: \_\_\_\_\_

Wir möchten Sie bitten die folgenden 12 Fragen zu beantworten. Jede Frage hat 5 Antwortmöglichkeiten, die von 0-4 entsprechend ihres Schweregrades eingeteilt sind.

**4 = geringster Schweregrad und 0 = höchster Schweregrad**

Bitte kreuzen Sie die Antwort an, die Ihren Zustand während der **letzten 4 Wochen** am besten beschreibt.

1. Wie würden Sie die Schmerzen beschreiben, die Sie gewöhnlich im betroffenen Fuß/Sprunggelenk empfinden?

- 4  keine
- 3  sehr geringe
- 2  geringe
- 1  mäßige
- 0  starke

2. Wie lange konnten Sie gehen, bis starke Schmerzen im betroffenen Fuß/Sprunggelenk aufgetreten sind?

- 4  mehr als 30 min ohne Schmerzen
- 3  16-30 min
- 2  5-10 min
- 1  kurze Strecken in und um das Haus
- 0  aufgrund starker Schmerzen nicht möglich

3. War es Ihnen möglich, auf unebenem Boden zu gehen?

- 4  ja, ohne Schwierigkeiten
- 3  mit geringen Schwierigkeiten
- 2  mit mäßigen Schwierigkeiten
- 1  mit starken Schwierigkeiten
- 0  nein, nicht möglich

4. Mussten Sie eine orthopädische Einlage, eine Fersenerhöhung oder spezielle Schuhe verwenden?

- 4  nie
- 3  gelegentlich
- 2  oft
- 1  meistens
- 0  immer

5. Wie stark haben Sie die Schmerzen im betroffenen Fuß/Sprunggelenk bei Ihrer üblichen Arbeit, Hausarbeit und Hobbies, beeinträchtigt?

- 4  gar nicht
- 3  ein wenig
- 2  mäßig
- 1  stark
- 0  vollständig

6. Hatten Sie aufgrund Ihres betroffenen Fußes/Sprunggelenks einen hinkenden Gang?

- 4  an keinem Tag
- 3  an ein bis zwei Tagen
- 2  an einigen Tagen
- 1  an den meisten Tagen
- 0  jeden Tag

7. Konnten Sie Treppen steigen?

- 4  ja, ohne Schwierigkeiten
- 3  mir geringen Schwierigkeiten
- 2  mit mäßigen Schwierigkeiten
- 1  mit starken Schwierigkeiten
- 0  nicht möglich

8. Haben Sie die Schmerzen im betroffenen Fuß/Sprunggelenk nachts im Bett beeinträchtigt?

- 4  an keiner Nacht
- 3  an ein bis zwei Nächten
- 2  an einigen Nächten
- 1  an den meisten Nächten
- 0  jede Nacht

9. Wie stark haben die Schmerzen im betroffenen Fuß/Sprunggelenk Ihre Freizeitaktivitäten beeinträchtigt?

- 4  gar nicht
- 3  ein wenig
- 2  mäßig
- 1  stark
- 0  vollständig

10. War Ihr Fuß geschwollen?

- 4  gar nicht
- 3  gelegentlich
- 2  oft
- 1  meistens
- 0  immer

11. Wie stark waren Ihre Schmerzen im betroffenen Fuß/Sprunggelenk, wenn Sie von einem Stuhl aufgestanden sind (z.B. nach dem Essen)?

- 4  keine Schmerzen
- 3  geringe Schmerzen
- 2  mäßige Schmerzen
- 1  starke Schmerzen
- 0  unerträgliche Schmerzen

12. Hatten Sie im betroffenen Fuß/Sprunggelenk plötzlich einschießende Schmerzen, ein Stechen oder Krämpfe?

- 4  an keinem Tag
- 3  an ein bis zwei Tagen
- 2  an einigen Tagen
- 1  an den meisten Tagen
- 0  jeden Tag

**Vielen Dank, dass Sie diese Fragen beantwortet haben**
