# Supplementary material for: Reliability, validity and responsiveness of the German self-reported foot and ankle score (SEFAS) in patients with foot or ankle surgery
Source: Springer Nature journal article supplement (doi:10.1186/s12891-017-1772-1), 2017-10-10
Supplement: MOESM2 [file 15124106]

Date when answering:    —    —

D D M M Y Y Y Y

## SELF-REPORTED FOOT & ANKLE QUESTIONNAIRE (SEFAS)

We would like you to answer the 12 questions below. Each question is graded from 0- 4  
**4 = the mildest or least troublesome and 0 = the most severe or most troublesome.**

Please cross the box that best describes your condition during the last 4 weeks

|                                                                                                                                                                                                                                                                                                                                                                                                                                          |                                                                                                                                                                                                                                                                                                                                                                                                                                   |
|------------------------------------------------------------------------------------------------------------------------------------------------------------------------------------------------------------------------------------------------------------------------------------------------------------------------------------------------------------------------------------------------------------------------------------------|-----------------------------------------------------------------------------------------------------------------------------------------------------------------------------------------------------------------------------------------------------------------------------------------------------------------------------------------------------------------------------------------------------------------------------------|
| <p>1. How would you describe the pain you usually have from the foot/ankle in question?</p> <p>4 <input type="checkbox"/> None<br/>           3 <input type="checkbox"/> Very mild<br/>           2 <input type="checkbox"/> Mild<br/>           1 <input type="checkbox"/> Moderate<br/>           0 <input type="checkbox"/> Severe</p>                                                                                                | <p>5. How much has the pain from the foot/ankle in question interfered with your usual work including housework and hobbies?</p> <p>4 <input type="checkbox"/> Not at all<br/>           3 <input type="checkbox"/> A bit<br/>           2 <input type="checkbox"/> Moderately<br/>           1 <input type="checkbox"/> Greatly<br/>           0 <input type="checkbox"/> Totally</p>                                            |
| <p>2. For how long have you been able to walk before severe pain arises from the foot/ ankle in question?</p> <p>4 <input type="checkbox"/> No pain up 30 min.<br/>           3 <input type="checkbox"/> 16-30 minutes<br/>           2 <input type="checkbox"/> 5-10 minutes<br/>           1 <input type="checkbox"/> Around the house only<br/>           0 <input type="checkbox"/> Unable to walk at all because of severe pain</p> | <p>6. Have you been limping when walking because of the foot/ankle in question?</p> <p>4 <input type="checkbox"/> No days<br/>           3 <input type="checkbox"/> Only one or two days<br/>           2 <input type="checkbox"/> <i>Some days</i><br/>           1 <input type="checkbox"/> Most days<br/>           0 <input type="checkbox"/> Every day</p>                                                                   |
| <p>3. Have you been able to walk on uneven ground?</p> <p>4 <input type="checkbox"/> Yes, easily<br/>           3 <input type="checkbox"/> With little difficulty<br/>           2 <input type="checkbox"/> With moderate difficulty<br/>           1 <input type="checkbox"/> With extreme difficulty<br/>           0 <input type="checkbox"/> No impossible</p>                                                                       | <p>7. Have you been able to climb <i>a flight of stairs</i>?</p> <p>4 <input type="checkbox"/> Yes, easily<br/>           3 <input type="checkbox"/> With little difficulty<br/>           2 <input type="checkbox"/> With moderate difficulty<br/>           1 <input type="checkbox"/> With extreme trouble<br/>           0 <input type="checkbox"/> Impossible</p>                                                            |
| <p>4. Have you had to use an orthotic (shoe insert), heel lift or special shoes?</p> <p>4 <input type="checkbox"/> Never<br/>           3 <input type="checkbox"/> Occasionally<br/>           2 <input type="checkbox"/> Often<br/>           1 <input type="checkbox"/> Most of the time<br/>           0 <input type="checkbox"/> Always</p>                                                                                          | <p>8. Have you been troubled by pain from the foot/ ankle in question in bed at night?</p> <p>4 <input type="checkbox"/> No night)<br/>           3 <input type="checkbox"/> Only one or two nights<br/>           2 <input type="checkbox"/> Some nights<br/>           1 <input type="checkbox"/> Most nights<br/>           0 <input type="checkbox"/> Every night</p>                                                         |
| <p>9. How much has pain from the foot/ankle in question affected your usual recreational activities?</p> <p>4 <input type="checkbox"/> Not at all<br/>           3 <input type="checkbox"/> A bit<br/>           2 <input type="checkbox"/> Moderately<br/>           1 <input type="checkbox"/> Greatly<br/>           0 <input type="checkbox"/> Totally</p>                                                                           | <p>11. After a meal (sat at a table) how painful has it been for you to stand up from a chair because of the foot/ankle in question?</p> <p>4 <input type="checkbox"/> Not at all painful<br/>           3 <input type="checkbox"/> Slightly painful<br/>           2 <input type="checkbox"/> Moderately painful<br/>           1 <input type="checkbox"/> Very painful<br/>           0 <input type="checkbox"/> Unbearable</p> |
| <p>10. Have you had swelling of your foot?</p> <p>4 <input type="checkbox"/> None at all<br/>           3 <input type="checkbox"/> Occasionally<br/>           2 <input type="checkbox"/> Often<br/>           1 <input type="checkbox"/> Most of the time<br/>           0 <input type="checkbox"/> All the time</p>                                                                                                                    | <p>12. Have you had a severe sudden pain shooting, stabbing or spasms from the foot/ankle in question?</p> <p>4 <input type="checkbox"/> No days<br/>           3 <input type="checkbox"/> Only one or two days<br/>           2 <input type="checkbox"/> Some day<br/>           1 <input type="checkbox"/> Most days<br/>           0 <input type="checkbox"/> Every day</p>                                                    |

**THANK YOUR FOR COMPLETING THESE QUESTIONS**
